# Supplementary material for: Absence of physiological Ca2+ transients is an initial trigger for mitochondrial dysfunction in skeletal muscle following denervation
Source: PubMed Central journal article supplement (PMC5387329; doi:10.1186/s13395-017-0123-0), 2017-04-10

Figure S2

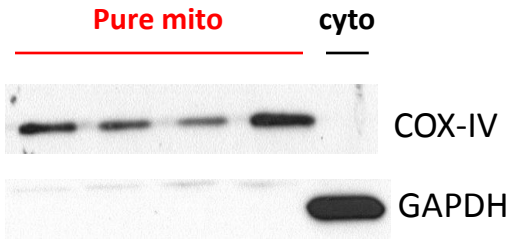

Supplement: 13395_2017_123_MOESM5_ESM.pdf [file 13395_2017_123_MOESM5_ESM.pdf]
